# Supplementary material for: Integrative transcriptome data mining for identification of core lncRNAs in breast cancer
Source: PeerJ journal article supplement (doi:10.7717/peerj.7821), 2019-10-07
Supplement: Supplemental_Table_S1.docx [file Supplemental_Table_S1.docx]

***Table S1*: Analysis results of 22 lncRNAs with the highest diagnostic value for breast cancer (AUC >0.95)**

| **ID** | **LncRNA** | **AUC** | **Log2FC** | **P-value** | **Adjusted P-value** |
| --- | --- | --- | --- | --- | --- |
| ENSG00000230838 | AC093850.2 | 0.987256073 | -6.518467237 | 1.16E-21 | 1.62E-20 |
| ENSG00000234456 | MAGI2-AS3 | 0.98537862 | 2.790281636 | 3.43E-208 | 2.18E-204 |
| ENSG00000215386 | LINC00478 | 0.984331797 | 1.221627852 | 8.14E-147 | 5.18E-144 |
| ENSG00000224958 | PGM5-AS1 | 0.980531376 | 1.008844731 | 6.36E-78 | 4.71E-76 |
| ENSG00000232079 | AL035610.1 | 0.980394834 | 1.12484618 | 5.84E-140 | 2.86E-137 |
| ENSG00000249669 | MIR143HG | 0.979848666 | 2.383057441 | 6.07E-173 | 8.58E-170 |
| ENSG00000245812 | RP11-175K6.1 | 0.975558969 | 2.038181369 | 7.42E-144 | 4.10E-141 |
| ENSG00000229108 | AC005550.4 | 0.972725721 | 2.392545089 | 2.39E-82 | 1.94E-80 |
| ENSG00000267532 | MIR497HG | 0.972486772 | 2.52750087 | 2.24E-180 | 4.08E-177 |
| ENSG00000269936 | MIR145 | 0.969346305 | 16.27722773 | 8.42E-171 | 1.07E-167 |
| ENSG00000255248 | MIR100HG | 0.968902543 | 2.931727281 | 2.33E-131 | 8.23E-129 |
| ENSG00000224525 | AL591686.1 | 0.965221596 | 1.456020974 | 4.23E-66 | 2.24E-64 |
| ENSG00000258545 | RHOXF1-AS1 | 0.963270183 | 2.446525882 | 4.84E-50 | 1.76E-48 |
| ENSG00000238018 | AC093110.1 | 0.960835182 | 6.114094248 | 6.29E-131 | 2.11E-128 |
| ENSG00000203499 | FAM83H-AS1 | 0.959776981 | -9.011338054 | 1.58E-28 | 2.93E-27 |
| ENSG00000255471 | AP001528.2 | 0.95849121 | 4.785024356 | 3.68E-115 | 9.01E-113 |
| ENSG00000243836 | WDR86-AS1 | 0.957797121 | 1.635455854 | 1.85E-61 | 9.02E-60 |
| ENSG00000272143 | FGF14-AS2 | 0.957694715 | 2.559096299 | 5.96E-115 | 1.43E-112 |
| ENSG00000267047 | AC040977.2 | 0.957034761 | 6.045085835 | 6.50E-165 | 5.91E-162 |
| ENSG00000236333 | TRHDE-AS1 | 0.952733686 | 2.362167348 | 2.45E-94 | 2.78E-92 |
| ENSG00000258441 | LINC00641 | 0.952528873 | 1.712459405 | 3.08E-96 | 3.70E-94 |
| ENSG00000246430 | LINC00968 | 0.95011663 | 1.334928907 | 2.16E-44 | 6.62E-43 |

FC: fold change. P＜0.05.
