# Supplementary material for: Integrative transcriptome data mining for identification of core lncRNAs in breast cancer
Source: PeerJ journal article supplement (doi:10.7717/peerj.7821), 2019-10-07
Supplement: Supplemental_Table_S2.docx [file Supplemental_Table_S2.docx]

***Table S2*: The result of the univariate cox analysis of core lncRNAs**

| LncRNA | coef | exp(coef) | exp(-coef) | lower .95 | upper .95 | se(coef) | z | Pr(>|z|) |
| --- | --- | --- | --- | --- | --- | --- | --- | --- |
| AC093850.2 | 0.038813354 | 1.039576433 | 0.961930233 | 1.017164355 | 1.062482335 | 0.01111992 | 3.490434782 | 0.000482235 |
| MAGI2-AS3 | 0.065098915 | 1.067264588 | 0.936974778 | 0.774042081 | 1.471565601 | 0.163894825 | 0.397199332 | 0.691220475 |
| LINC00478 | -0.03286953 | 0.967664803 | 1.033415701 | 0.56851814 | 1.64704537 | 0.271358317 | -0.121129621 | 0.903588368 |
| PGM5-AS1 | -0.086048419 | 0.917549803 | 1.089859097 | 0.610738213 | 1.378491837 | 0.207676494 | -0.41433875 | 0.678626039 |
| AL035610.1 | -1.377220957 | 0.252278673 | 3.96387054 | 0.021608533 | 2.945342372 | 1.25382203 | -1.098418215 | 0.272021912 |
| MIR143HG | -0.180174884 | 0.835124149 | 1.197426756 | 0.439047315 | 1.588512944 | 0.328053583 | -0.549223948 | 0.582851771 |
| RP11-175K6.1 | -0.236377176 | 0.789482844 | 1.266651971 | 0.295017739 | 2.11269723 | 0.502224849 | -0.470660058 | 0.637883512 |
| AC005550.4 | -0.330989912 | 0.718212415 | 1.392345746 | 0.32813335 | 1.5720105 | 0.399673306 | -0.82815116 | 0.407584899 |
| MIR497HG | -0.105282128 | 0.900070552 | 1.111024017 | 0.660407037 | 1.226708609 | 0.157970649 | -0.666466387 | 0.505113042 |
| MIR145 | -0.011212029 | 0.988850592 | 1.011275119 | 0.919699778 | 1.06320075 | 0.036988415 | -0.303122707 | 0.76179635 |
